# Supplementary material for: CDK6 Degradation Is Counteracted by p16INK4A and p18INK4C in AML
Source: MDPI journal article supplement (doi:10.3390/cancers14061554), 2022-03-18

Figure 1D

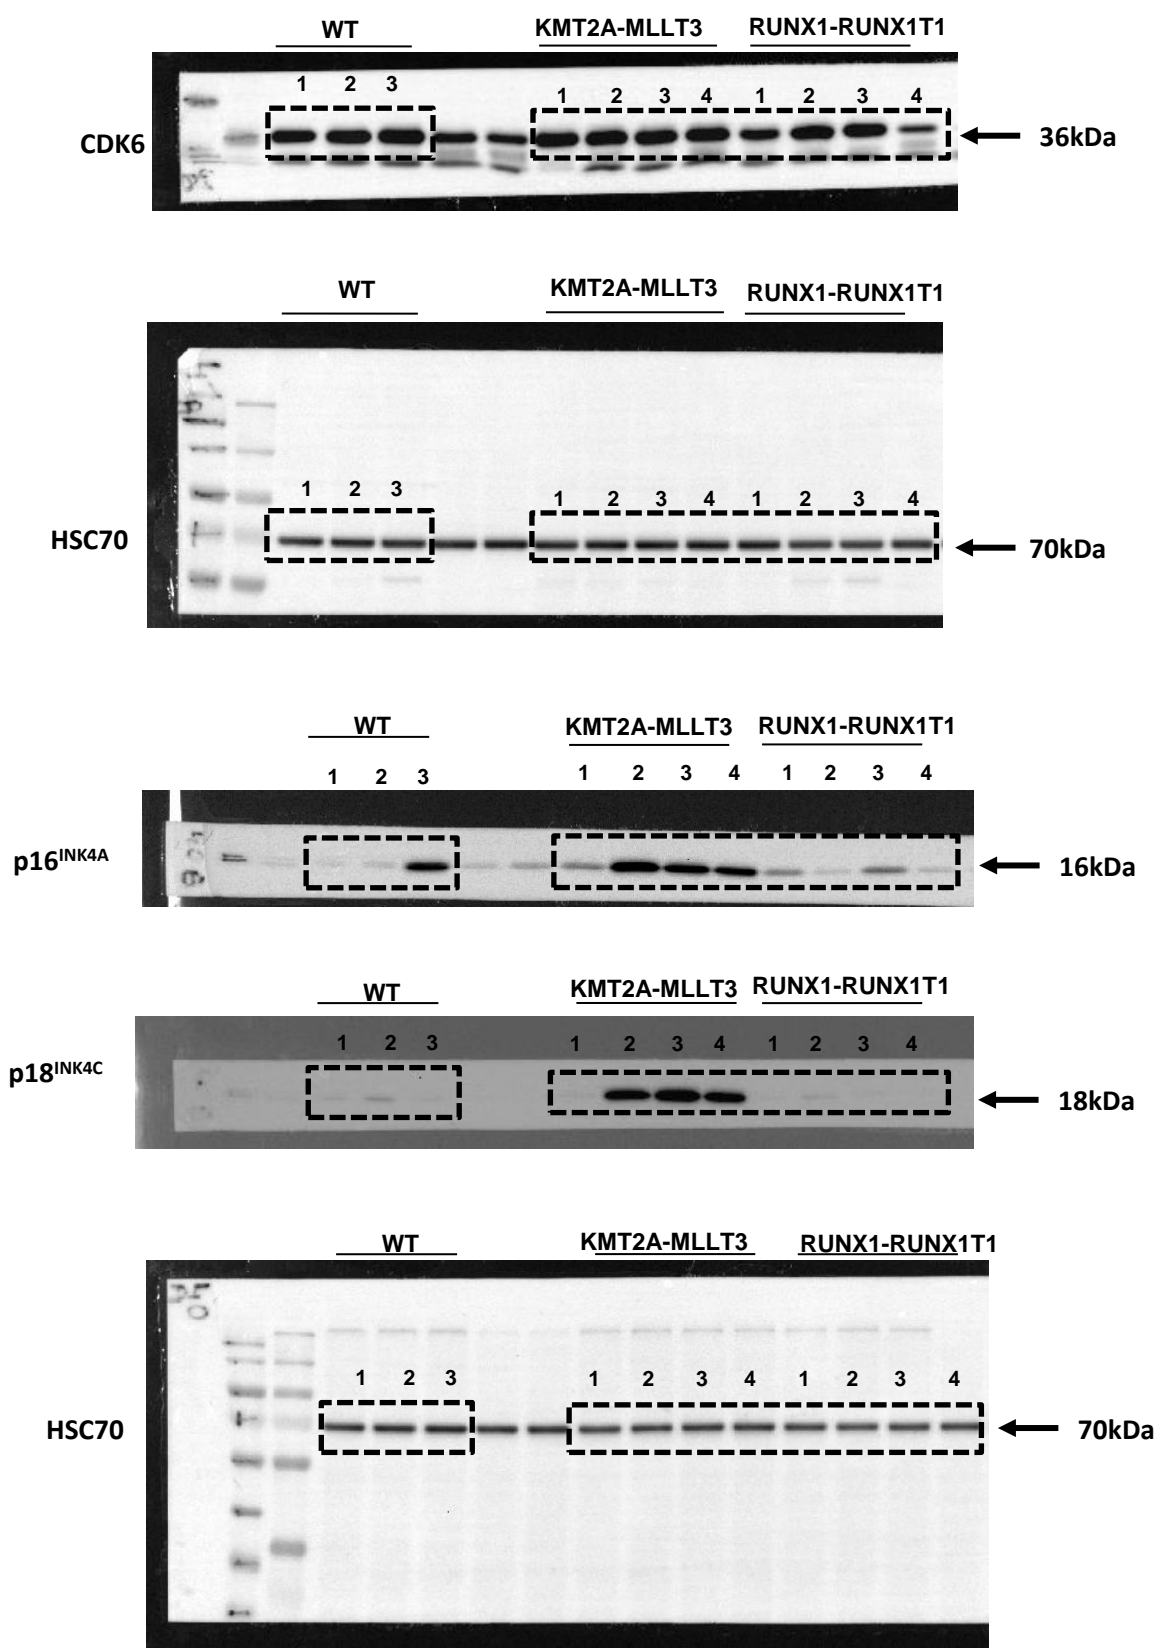

Figure S2A

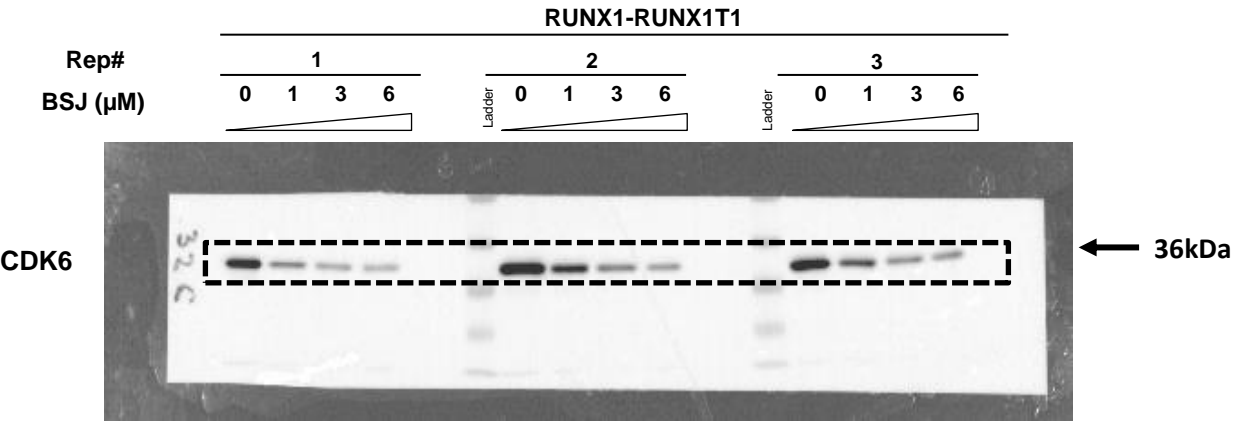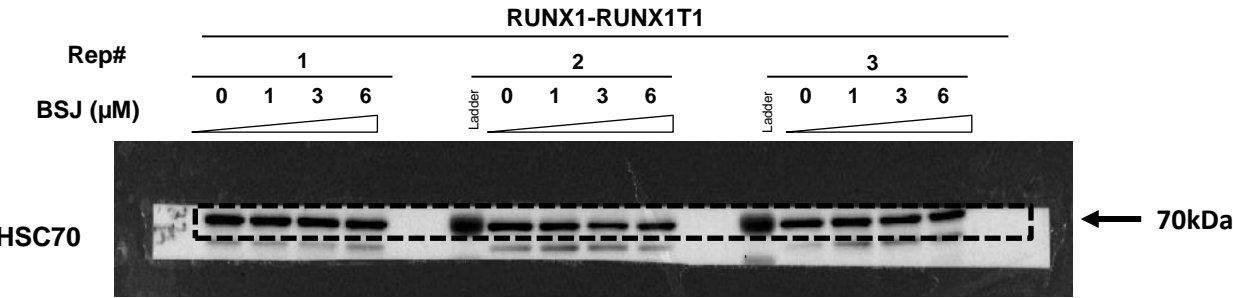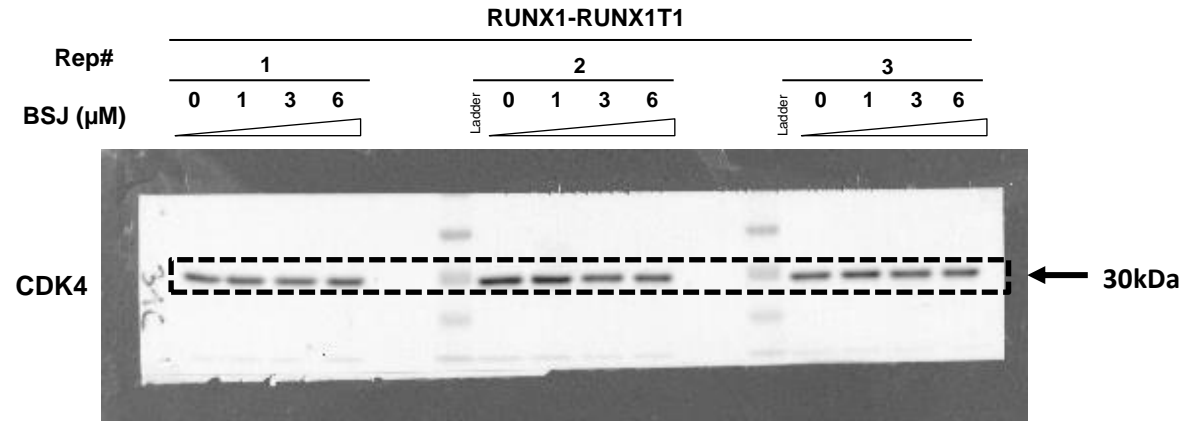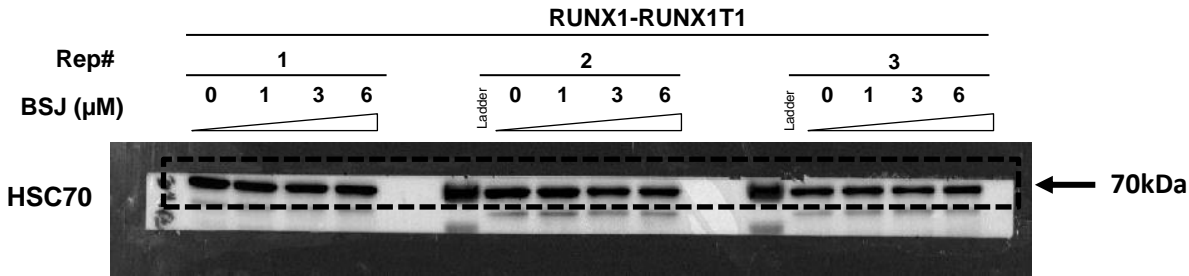

Figure S2C

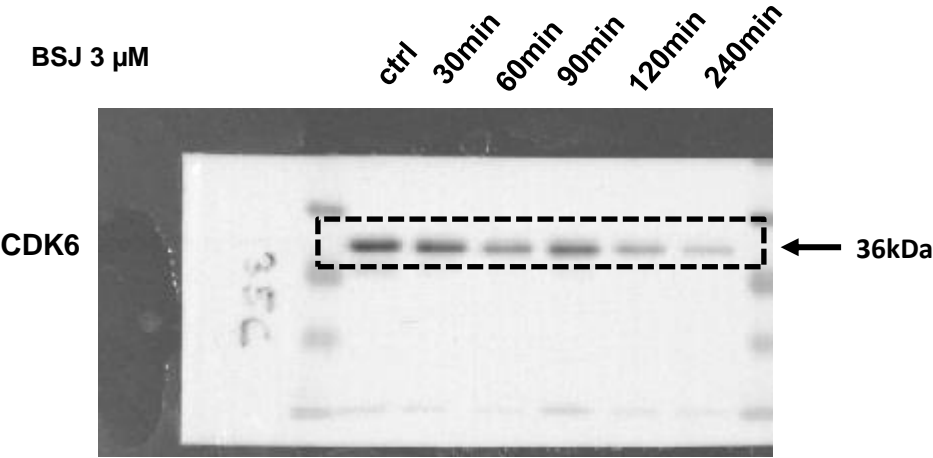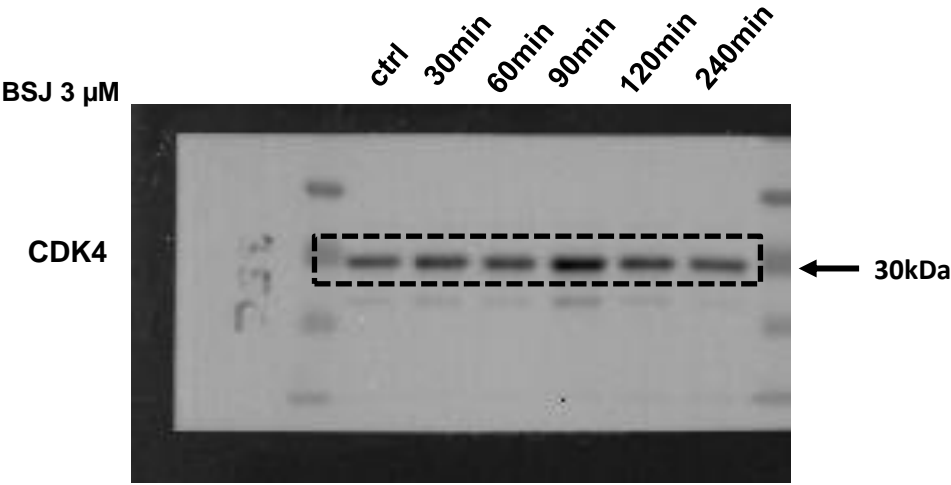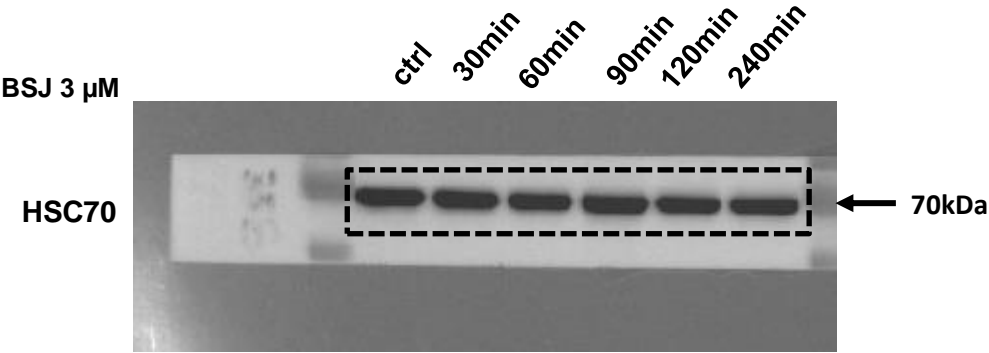

Figure 3A

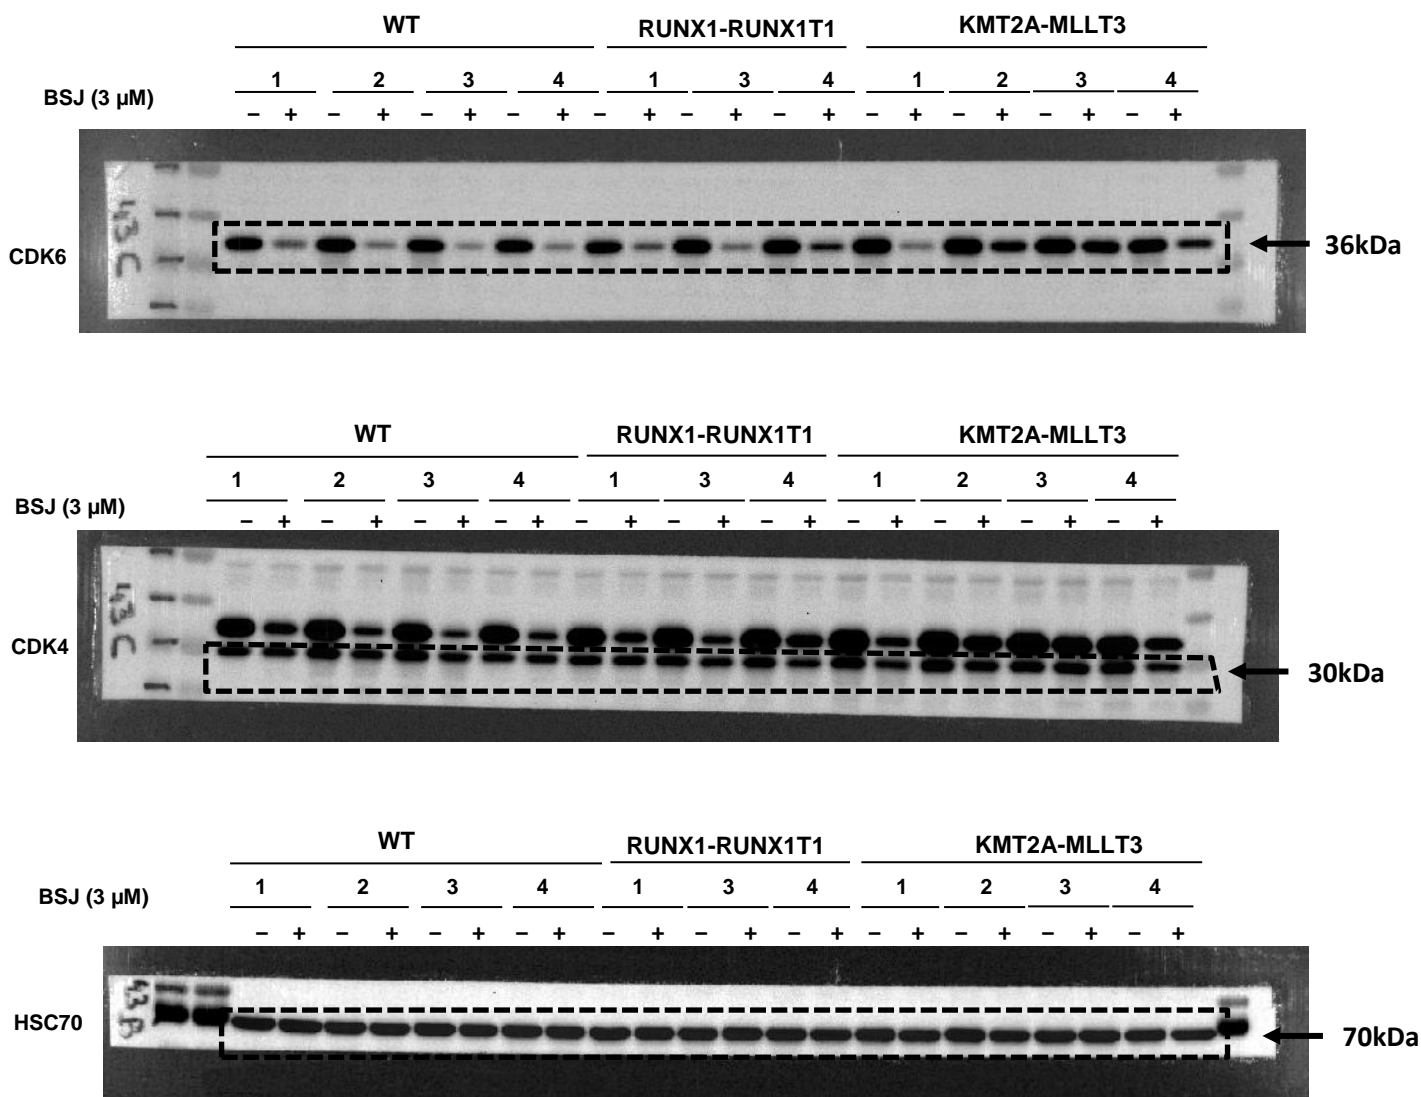

Figure 3E

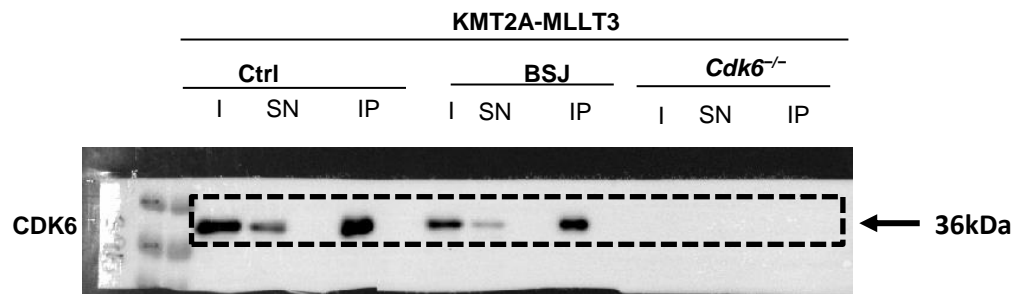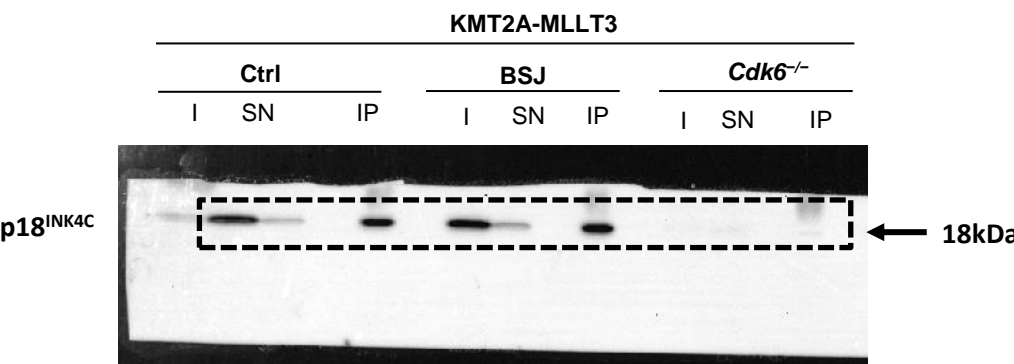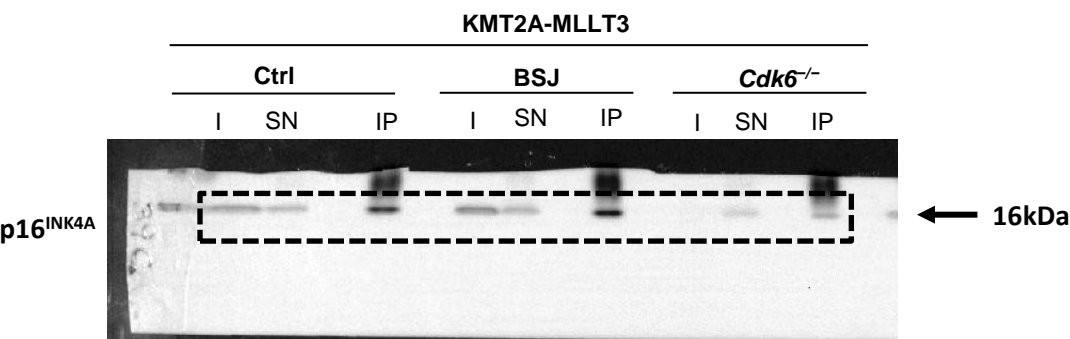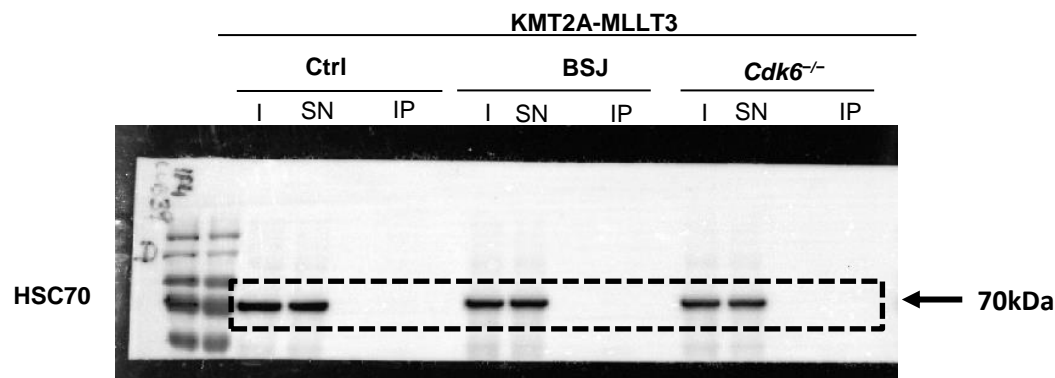

Figure 3F

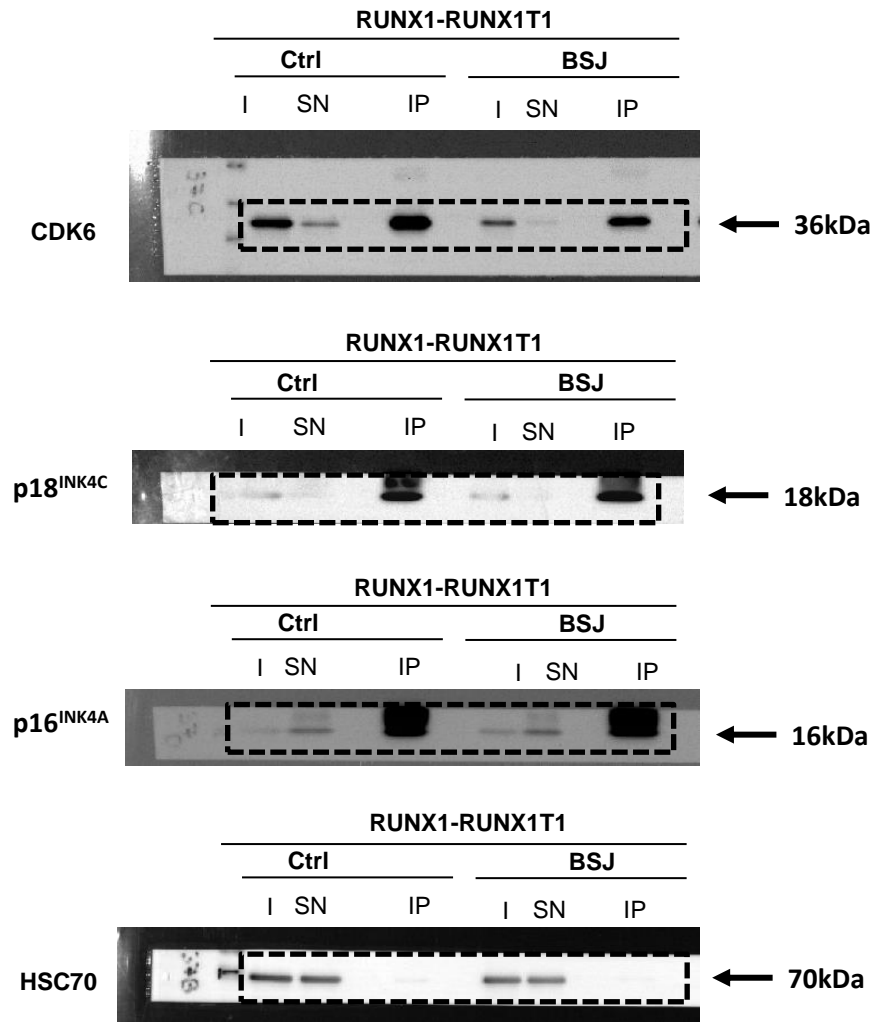

Figure S3B

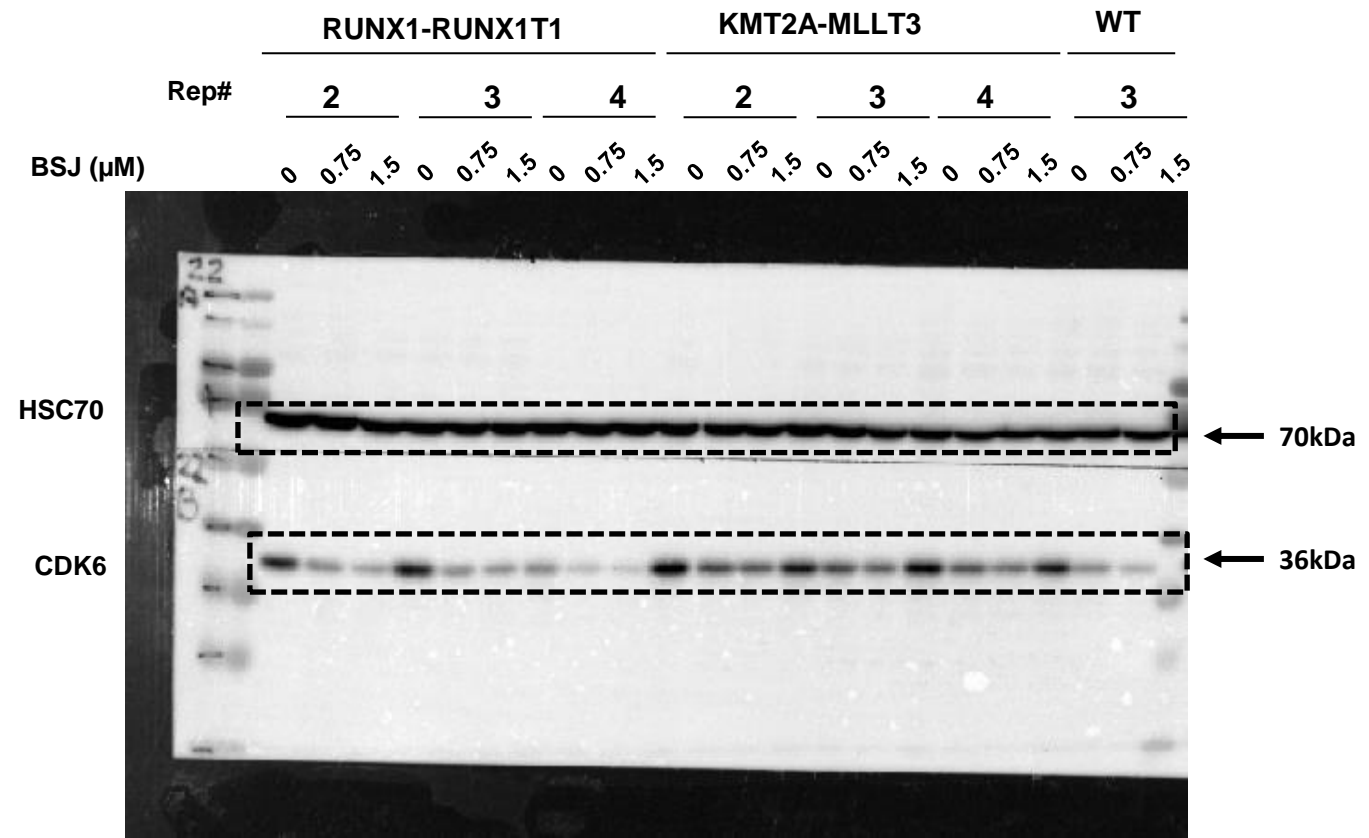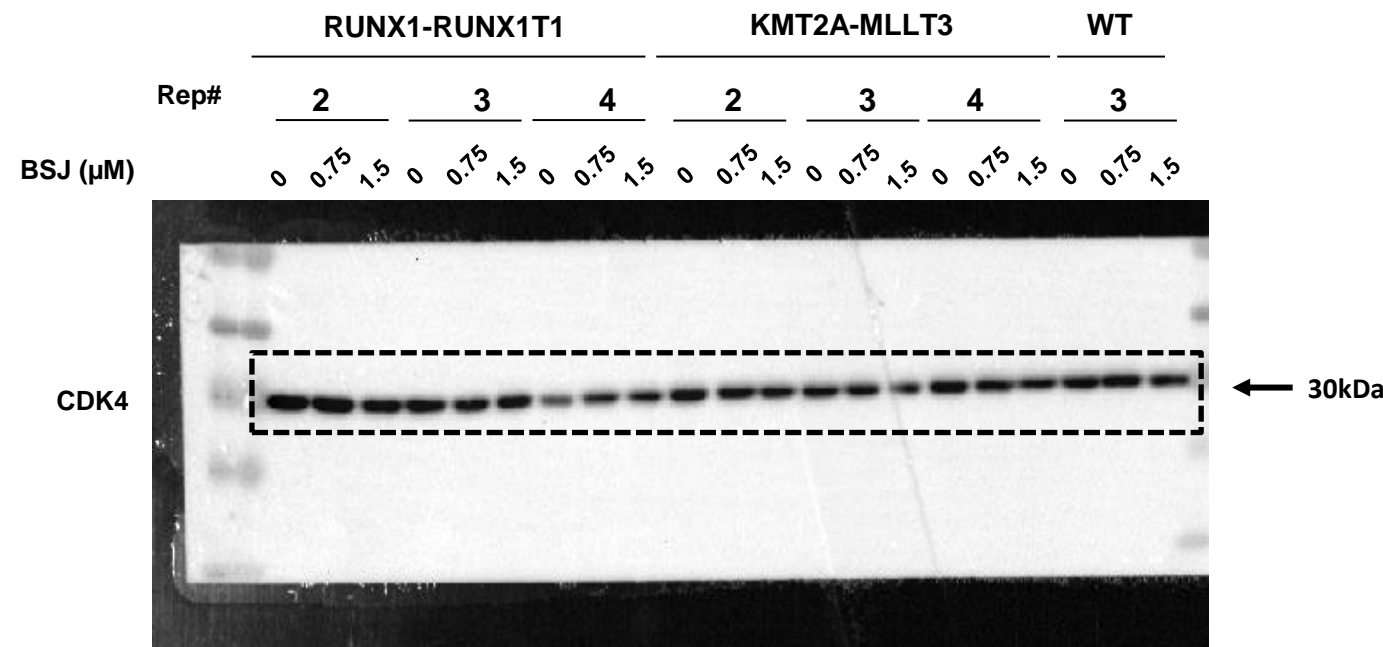

Figure 4A

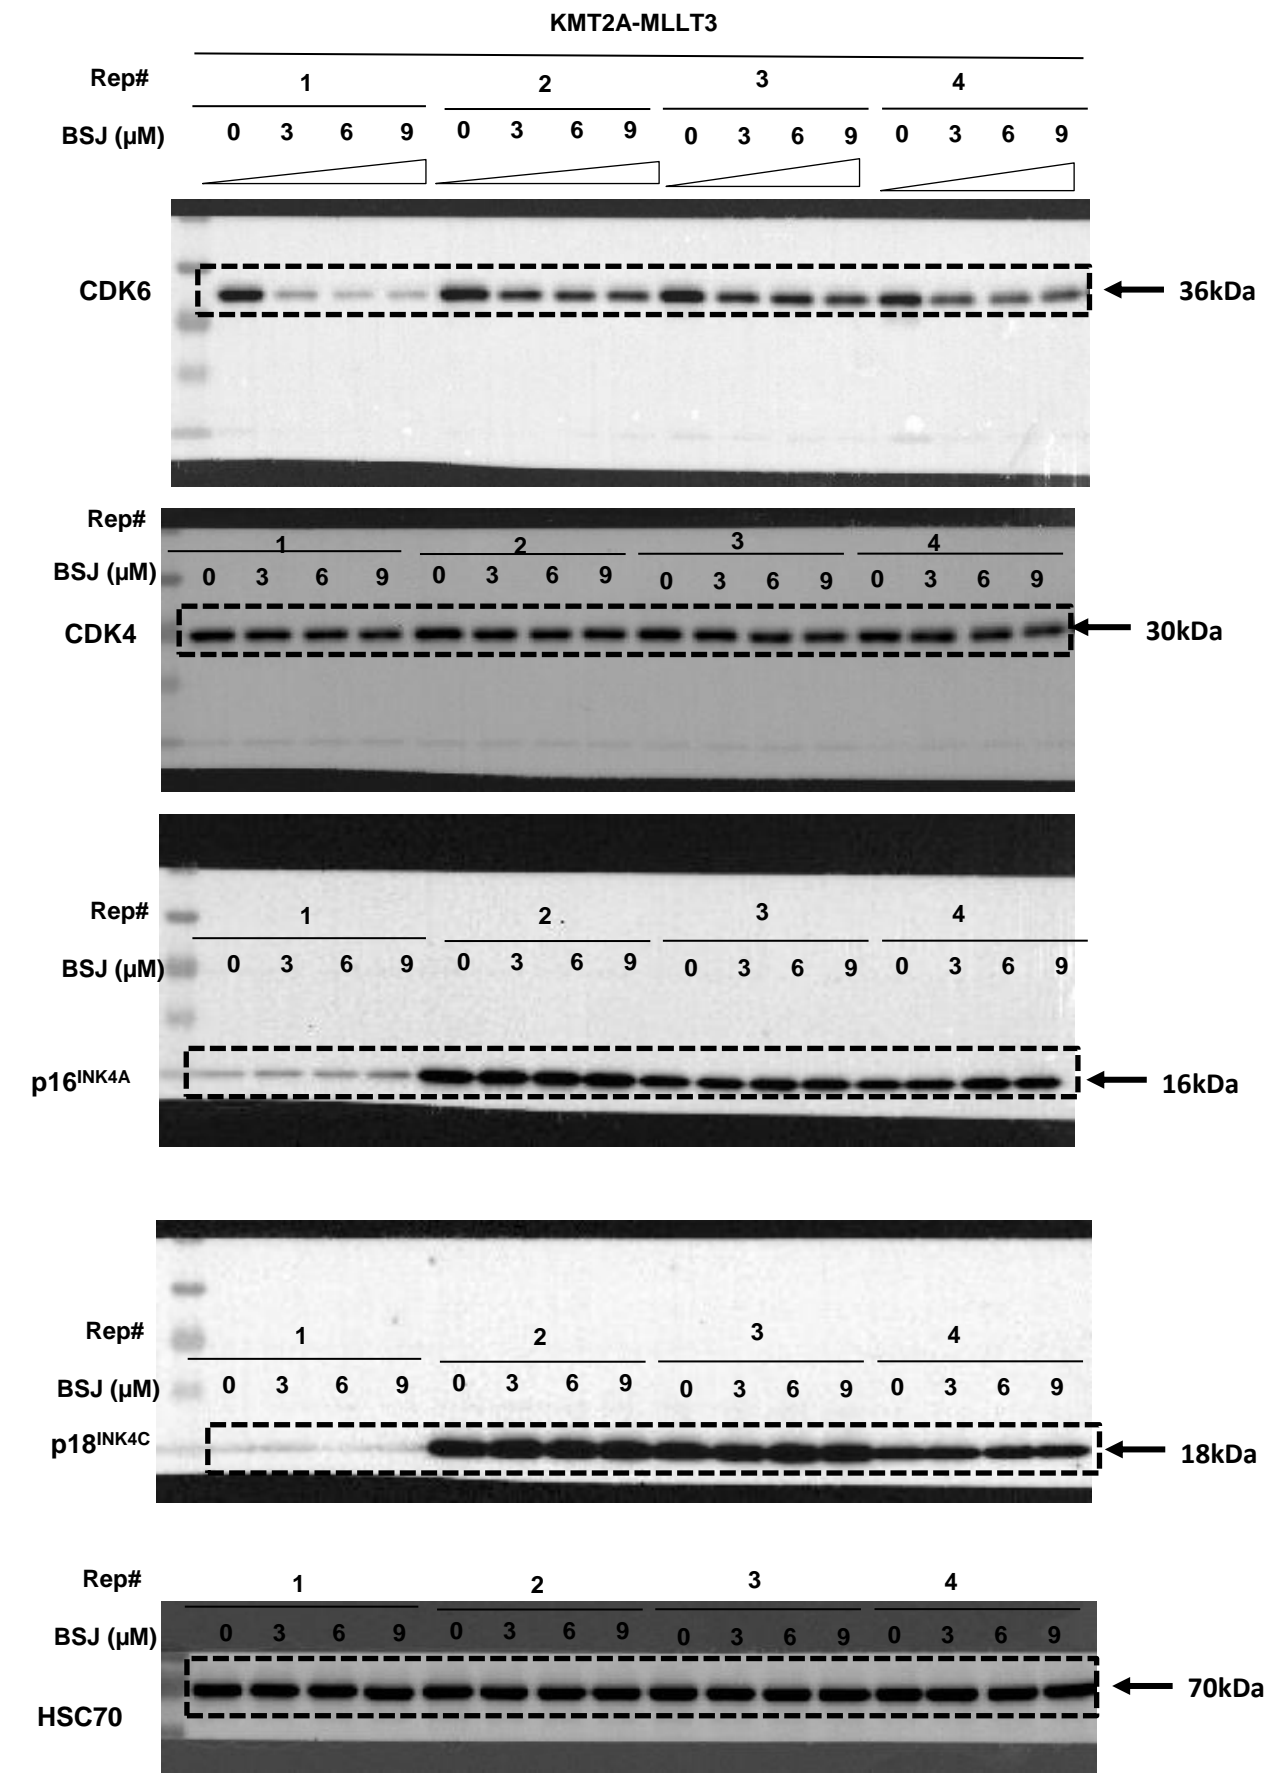



Figure 4D

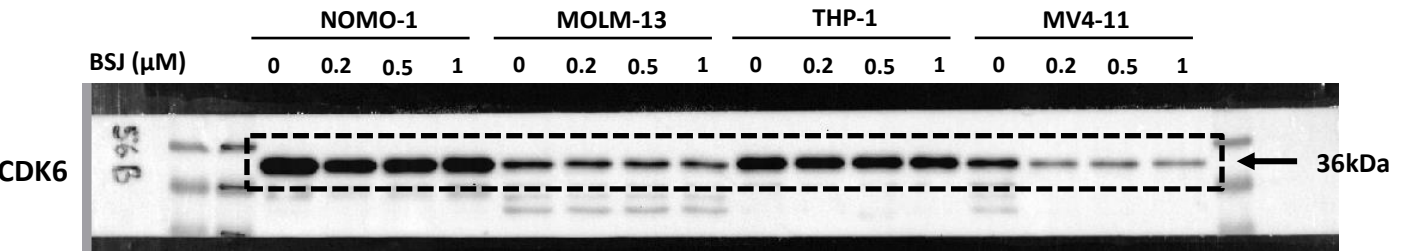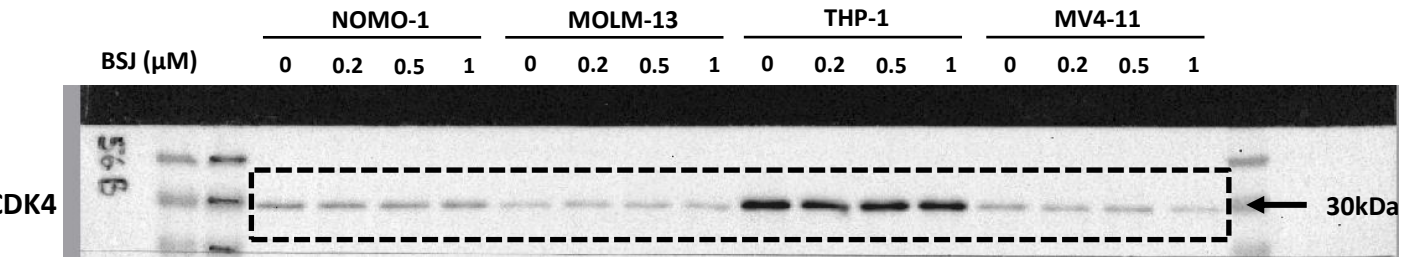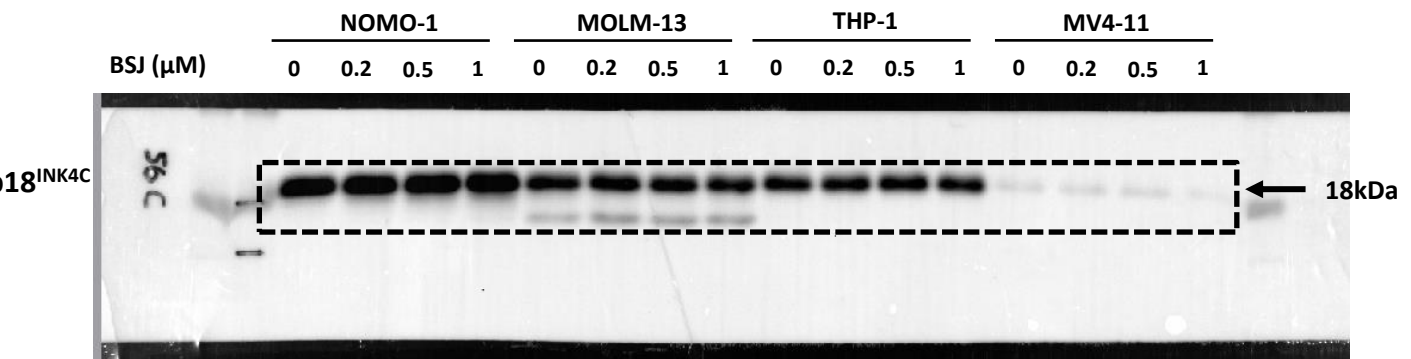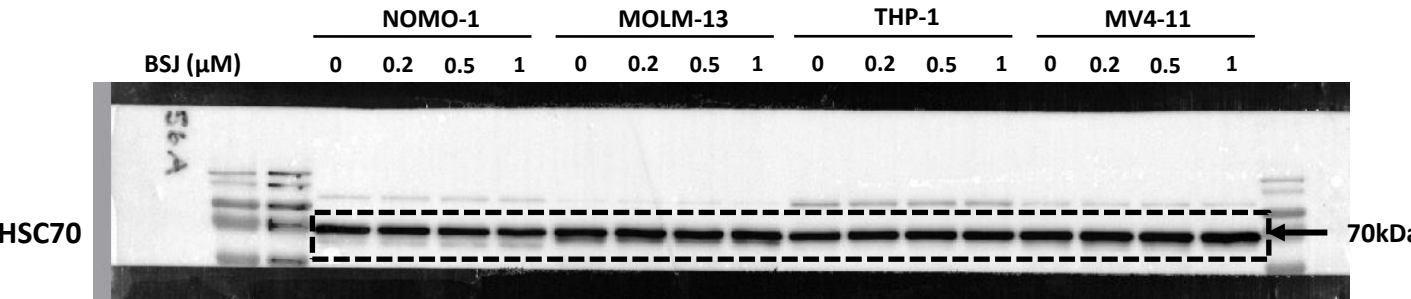

Figure S4A I

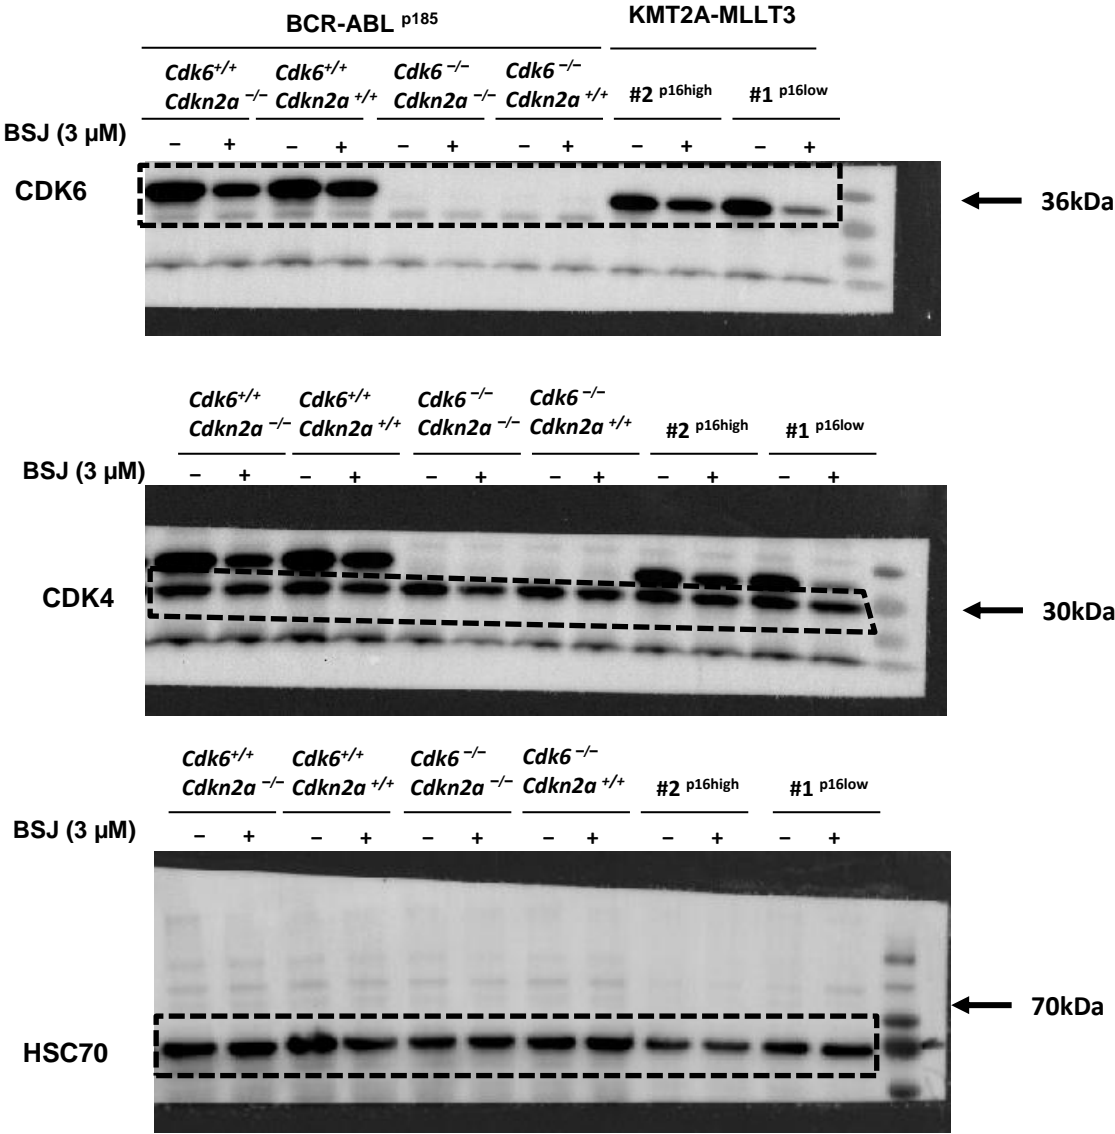

Figure S4A II

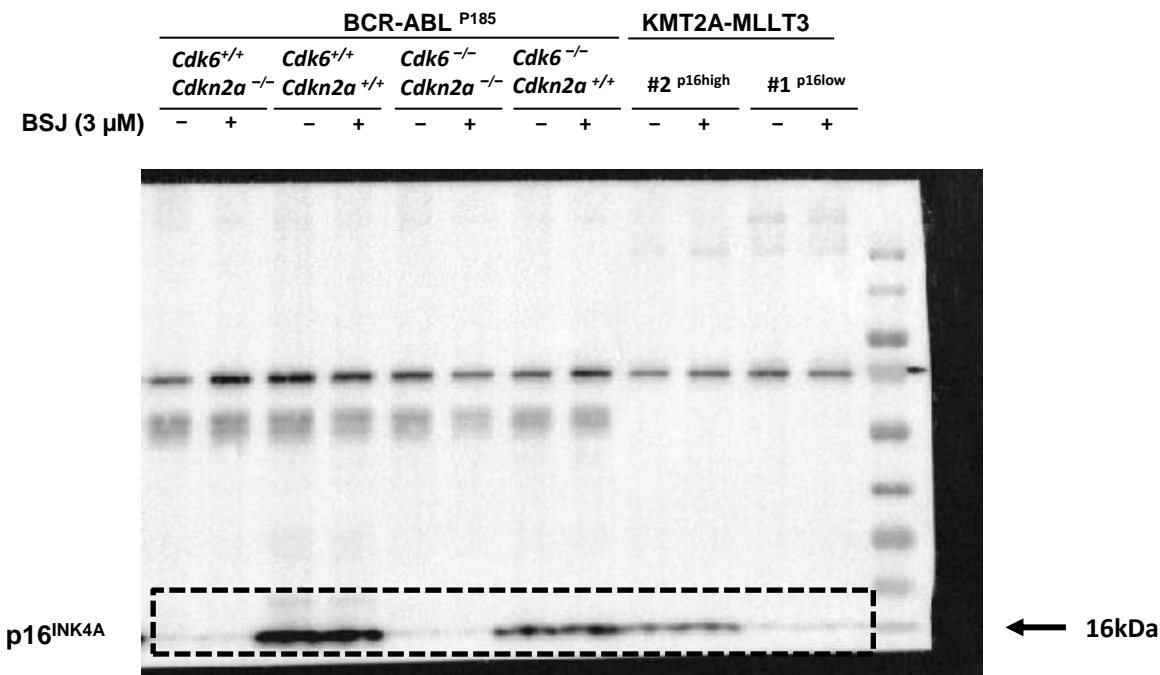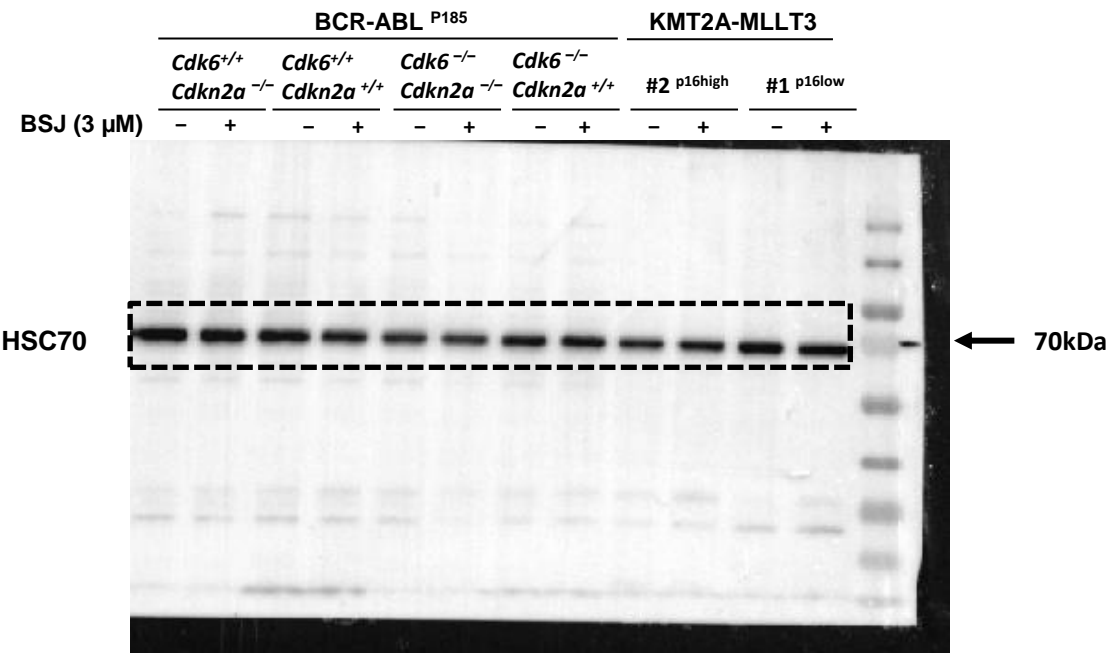

Supplement: s1 [file s1]
